# Supplementary material for: The Public’s Awareness of and Attitude Toward Research Biobanks – A Regional German Survey
Source: PubMed Central journal article supplement (PMC5977155; doi:10.3389/fgene.2018.00190), 2018-05-24
Supplement: Presentation_2.pdf [file Presentation_2.pdf]

## Logistic Regression; dependent variable: "prior awareness of biobanks"

Method: ENTER

### Notes

|                        |                                                                                                                                                                                                                                                                                                                                                                                                                                                            |                                                    |
|------------------------|------------------------------------------------------------------------------------------------------------------------------------------------------------------------------------------------------------------------------------------------------------------------------------------------------------------------------------------------------------------------------------------------------------------------------------------------------------|----------------------------------------------------|
| Output Created         | I-2017 13:14:04                                                                                                                                                                                                                                                                                                                                                                                                                                            |                                                    |
| Comments               |                                                                                                                                                                                                                                                                                                                                                                                                                                                            |                                                    |
|                        | N of Rows in Working Data File                                                                                                                                                                                                                                                                                                                                                                                                                             | 204                                                |
| Missing Value Handling | Definition of Missing                                                                                                                                                                                                                                                                                                                                                                                                                                      | User-defined missing values are treated as missing |
| Syntax                 | <pre>LOGISTIC REGRESSION VARIABLES var_9adicho /METHOD=ENTER var_3dicho age_gr Var_12 edu_grob health_job research_exp nat_dicho /CONTRAST (var_3dicho)=Indicator /CONTRAST (age_gr)=Indicator(1) /CONTRAST (Var_12)=Indicator(1) /CONTRAST (edu_grob)=Indicator(1) /CONTRAST (health_job)=Indicator(1) /CONTRAST (research_exp)=Indicator(1) /CONTRAST (nat_dicho)=Indicator(1) /PRINT=GOODFIT /CRITERIA=PIN(0.05) POUT(0.10) ITERATE(20) CUT(0.5).</pre> |                                                    |

### Case Processing Summary

| Unweighted Cases <sup>a</sup> |                      | N   | Percent |
|-------------------------------|----------------------|-----|---------|
| Selected Cases                | Included in Analysis | 193 | 94,6    |
|                               | Missing Cases        | 11  | 5,4     |
|                               | Total                | 204 | 100,0   |
| Unselected Cases              |                      | 0   | 0,0     |
| Total                         |                      | 204 | 100,0   |

a. If weight is in effect, see classification table for the total number of cases.

### Dependent Variable Encoding

| Original Value | Internal Value |
|----------------|----------------|
| 0 no           | 0              |
| 1 yes          | 1              |

### Categorical Variables Codings

|                                                                             |                                    | Frequency | Parameter coding (1) | (2)   | (3)   | (4)   | (5)   | (6)   |
|-----------------------------------------------------------------------------|------------------------------------|-----------|----------------------|-------|-------|-------|-------|-------|
| age_gr age-groups (steps of 10 years)                                       | 1 18-29                            | 31        | 0,000                | 0,000 | 0,000 | 0,000 | 0,000 | 0,000 |
|                                                                             | 2 30-39                            | 18        | 1,000                | 0,000 | 0,000 | 0,000 | 0,000 | 0,000 |
|                                                                             | 3 40-49                            | 33        | 0,000                | 1,000 | 0,000 | 0,000 | 0,000 | 0,000 |
|                                                                             | 4 50-59                            | 46        | 0,000                | 0,000 | 1,000 | 0,000 | 0,000 | 0,000 |
|                                                                             | 5 60-69                            | 22        | 0,000                | 0,000 | 0,000 | 1,000 | 0,000 | 0,000 |
|                                                                             | 6 70-79                            | 31        | 0,000                | 0,000 | 0,000 | 0,000 | 1,000 | 0,000 |
|                                                                             | 7 80 oder älter                    | 12        | 0,000                | 0,000 | 0,000 | 0,000 | 0,000 | 1,000 |
| edu_grob school education (low - middle - high)                             | 1 low (kein Abschluss/Hauptschule) | 24        | 0,000                | 0,000 | 0,000 |       |       |       |
|                                                                             | 2 middle (Realschule)              | 46        | 1,000                | 0,000 | 0,000 |       |       |       |
|                                                                             | 3 high ((Fach)-Abitur)             | 113       | 0,000                | 1,000 | 0,000 |       |       |       |
|                                                                             | 8 other/still going to school      | 10        | 0,000                | 0,000 | 1,000 |       |       |       |
| var_3dicho assessment of genetic research (approve - disapprove - not sure) | 0 disapprove (somewhat/definitely) | 33        | 1,000                | 0,000 |       |       |       |       |
|                                                                             | 1 approve (somewhat/definitely)    | 121       | 0,000                | 1,000 |       |       |       |       |
|                                                                             | 3 not sure                         | 39        | 0,000                | 0,000 |       |       |       |       |
| health_job have you ever worked in the health care-sector?                  | 0 no, never                        | 155       | 0,000                |       |       |       |       |       |
|                                                                             | 1 yes, currently/before            | 38        | 1,000                |       |       |       |       |       |
| research_exp have you ever participated in research?                        | 0 no                               | 165       | 0,000                |       |       |       |       |       |
|                                                                             | 1 yes                              | 28        | 1,000                |       |       |       |       |       |
| Var_12 gender                                                               | 1 male                             | 82        | 0,000                |       |       |       |       |       |
|                                                                             | 2 female                           | 111       | 1,000                |       |       |       |       |       |
| nat_dicho nationality (binary coding)                                       | 1 only German                      | 178       | 0,000                |       |       |       |       |       |
|                                                                             | 2 German & other / only other      | 15        | 1,000                |       |       |       |       |       |

### Block 0: Beginning Block

Classification Table<sup>a,b</sup>

| Observed           | var_9adicho ever heard of biobanks before (0/1-coding) | Predicted                                              |       | Percentage Correct |
|--------------------|--------------------------------------------------------|--------------------------------------------------------|-------|--------------------|
|                    |                                                        | var_9adicho ever heard of biobanks before (0/1-coding) |       |                    |
|                    |                                                        | 0 no                                                   | 1 yes |                    |
| Step 0             | 0 no                                                   | 133                                                    | 0     | 100,0              |
|                    | 1 yes                                                  | 60                                                     | 0     | 0,0                |
| Overall Percentage |                                                        |                                                        |       | 68,9               |

a. Constant is included in the model.

b. The cut value is ,500

### Variables in the Equation

|        |          | B      | S.E.  | Wald   | df | Sig.  | Exp(B) |
|--------|----------|--------|-------|--------|----|-------|--------|
| Step 0 | Constant | -0,796 | 0,156 | 26,199 | 1  | 0,000 | 0,451  |

### Variables not in the Equation

|                    |           |                                                                     | Score  | df | Sig.  |
|--------------------|-----------|---------------------------------------------------------------------|--------|----|-------|
| Step 0             | Variables | assessment of genetic research (approve - disapprove - not sure)    | 0,300  | 2  | 0,861 |
|                    |           | assessment of genetic research (approve - disapprove - not sure)(1) | 0,270  | 1  | 0,603 |
|                    |           | assessment of genetic research (approve - disapprove - not sure)(2) | 0,198  | 1  | 0,656 |
|                    |           | age-groups (steps of 10 years)                                      | 3,571  | 6  | 0,735 |
|                    |           | age-groups (steps of 10 years)(1)                                   | 0,047  | 1  | 0,829 |
|                    |           | age-groups (steps of 10 years)(2)                                   | 0,270  | 1  | 0,603 |
|                    |           | age-groups (steps of 10 years)(3)                                   | 1,823  | 1  | 0,177 |
|                    |           | age-groups (steps of 10 years)(4)                                   | 0,323  | 1  | 0,570 |
|                    |           | age-groups (steps of 10 years)(5)                                   | 0,073  | 1  | 0,787 |
|                    |           | age-groups (steps of 10 years)(6)                                   | 1,242  | 1  | 0,265 |
|                    |           | gender(1)                                                           | 0,225  | 1  | 0,635 |
|                    |           | school education (low - middle - high)                              | 12,276 | 3  | 0,006 |
|                    |           | school education (low - middle - high)(1)                           | 0,705  | 1  | 0,401 |
|                    |           | school education (low - middle - high)(2)                           | 4,704  | 1  | 0,030 |
|                    |           | school education (low - middle - high)(3)                           | 1,761  | 1  | 0,185 |
|                    |           | have you ever worked in the health care-sector?(1)                  | 0,215  | 1  | 0,643 |
|                    |           | have you ever participated in research?(1)                          | 2,118  | 1  | 0,146 |
|                    |           | nationality (binary coding)(1)                                      | 0,603  | 1  | 0,437 |
| Overall Statistics |           |                                                                     | 19,756 | 15 | 0,182 |

### Block 1: Method = Enter

#### Omnibus Tests of Model Coefficients

|        |       | Chi-square | df | Sig.  |
|--------|-------|------------|----|-------|
| Step 1 | Step  | 23,582     | 15 | 0,073 |
|        | Block | 23,582     | 15 | 0,073 |
|        | Model | 23,582     | 15 | 0,073 |

### Model Summary

| Step | -2 Log likelihood    | Cox & Snell R Square | Nagelkerke R Square |
|------|----------------------|----------------------|---------------------|
| 1    | 215,662 <sup>a</sup> | 0,115                | 0,162               |

a. Estimation terminated at iteration number 6 because parameter estimates changed by less

### Hosmer and Lemeshow Test

| Step | Chi-square | df | Sig.  |
|------|------------|----|-------|
| 1    | 5,415      | 8  | 0,712 |

### Contingency Table for Hosmer and Lemeshow Test

|  |    | var_9adicho ever heard of biobanks before (0/1-coding) = 0 |          | var_9adicho ever heard of biobanks before (0/1-coding) = 1 yes |          | Total |
|--|----|------------------------------------------------------------|----------|----------------------------------------------------------------|----------|-------|
|  |    | Observed                                                   | Expected | Observed                                                       | Expected |       |
|  |    | Step 1                                                     |          |                                                                |          |       |
|  | 1  | 19                                                         | 18,339   | 0                                                              | 0,661    | 19    |
|  | 2  | 16                                                         | 16,738   | 3                                                              | 2,262    | 19    |
|  | 3  | 12                                                         | 14,685   | 7                                                              | 4,315    | 19    |
|  | 4  | 15                                                         | 15,344   | 6                                                              | 5,656    | 21    |
|  | 5  | 15                                                         | 13,364   | 4                                                              | 5,636    | 19    |
|  | 6  | 13                                                         | 12,700   | 6                                                              | 6,300    | 19    |
|  | 7  | 14                                                         | 11,963   | 5                                                              | 7,037    | 19    |
|  | 8  | 11                                                         | 11,572   | 9                                                              | 8,428    | 20    |
|  | 9  | 11                                                         | 10,005   | 8                                                              | 8,995    | 19    |
|  | 10 | 7                                                          | 8,290    | 12                                                             | 10,710   | 19    |

### Classification Table<sup>a</sup>

| Observed |                                                               | Predicted                                                     |       | Percentage Correct |
|----------|---------------------------------------------------------------|---------------------------------------------------------------|-------|--------------------|
|          |                                                               | var_9adicho ever heard of biobanks before (0/1-coding) = 0 no | 1 yes |                    |
| Step 1   | var_9adicho ever heard of biobanks before (0/1-coding) = 0 no | 124                                                           | 9     | 93,2               |
|          | 1 yes                                                         | 48                                                            | 12    | 20,0               |
|          | Overall Percentage                                            |                                                               |       | 70,5               |

a. The cut value is ,500

**Variables in the Equation**

|                     |                                                                     | B      | S.E.  | Wald  | df | Sig.  | Exp(B) |
|---------------------|---------------------------------------------------------------------|--------|-------|-------|----|-------|--------|
| Step 1 <sup>a</sup> | assessment of genetic research (approve - disapprove - not sure)    |        |       | 1,624 | 2  | 0,444 |        |
|                     | assessment of genetic research (approve - disapprove - not sure)(1) | -0,748 | 0,599 | 1,558 | 1  | 0,212 | 0,474  |
|                     | assessment of genetic research (approve - disapprove - not sure)(2) | -0,420 | 0,449 | 0,877 | 1  | 0,349 | 0,657  |
|                     | age-groups (steps of 10 years)                                      |        |       | 5,576 | 6  | 0,472 |        |
|                     | age-groups (steps of 10 years)(1)                                   | 0,340  | 0,666 | 0,261 | 1  | 0,609 | 1,406  |
|                     | age-groups (steps of 10 years)(2)                                   | 0,277  | 0,590 | 0,221 | 1  | 0,639 | 1,320  |
|                     | age-groups (steps of 10 years)(3)                                   | 0,999  | 0,563 | 3,147 | 1  | 0,076 | 2,716  |
|                     | age-groups (steps of 10 years)(4)                                   | 0,992  | 0,659 | 2,269 | 1  | 0,132 | 2,697  |
|                     | age-groups (steps of 10 years)(5)                                   | 0,726  | 0,633 | 1,315 | 1  | 0,252 | 2,067  |
|                     | age-groups (steps of 10 years)(6)                                   | -0,314 | 0,924 | 0,116 | 1  | 0,734 | 0,730  |
|                     | gender(1)                                                           | -0,239 | 0,348 | 0,472 | 1  | 0,492 | 0,788  |
|                     | school education (low - middle - high)                              |        |       | 9,421 | 3  | 0,024 |        |
|                     | school education (low - middle - high)(1)                           | 2,229  | 1,094 | 4,149 | 1  | 0,042 | 9,286  |
|                     | school education (low - middle - high)(2)                           | 2,883  | 1,072 | 7,231 | 1  | 0,007 | 17,866 |
|                     | school education (low - middle - high)(3)                           | 3,270  | 1,236 | 7,003 | 1  | 0,008 | 26,320 |
|                     | have you ever worked in the health care-sector?(1)                  | 0,127  | 0,427 | 0,088 | 1  | 0,767 | 1,135  |
|                     | have you ever participated in research?(1)                          | 0,443  | 0,461 | 0,922 | 1  | 0,337 | 1,557  |
|                     | nationality (binary coding)(1)                                      | 0,427  | 0,610 | 0,492 | 1  | 0,483 | 1,533  |
|                     | Constant                                                            | -3,503 | 1,155 | 9,192 | 1  | 0,002 | 0,030  |

a. Variable(s) entered on step 1: assessment of genetic research (approve - disapprove - not sure), age-groups (steps of 10 years), gender, school education (low - middle - high), have you ever

**Logistic Regression; dependent variable: "prior awareness of biobanks"**

**Method: Forward Stepwise (Wald)**

**Notes**

|                        |                                                                                                                                                                                                                                                                                                                                                                                                                                                                                         |                                                    |
|------------------------|-----------------------------------------------------------------------------------------------------------------------------------------------------------------------------------------------------------------------------------------------------------------------------------------------------------------------------------------------------------------------------------------------------------------------------------------------------------------------------------------|----------------------------------------------------|
| Output Created         | I-2017 13:14:04                                                                                                                                                                                                                                                                                                                                                                                                                                                                         |                                                    |
|                        | N of Rows in Working Data File                                                                                                                                                                                                                                                                                                                                                                                                                                                          | 204                                                |
| Missing Value Handling | Definition of Missing                                                                                                                                                                                                                                                                                                                                                                                                                                                                   | User-defined missing values are treated as missing |
| Syntax                 | LOGISTIC REGRESSION VARIABLES var_9adicho<br>/METHOD=FSSTEP(WALD) var_3dicho age_gr Var_12 edu_grob<br>health_job research_exp nat_dicho<br>/CONTRAST (var_3dicho)=Indicator<br>/CONTRAST (age_gr)=Indicator(1)<br>/CONTRAST (Var_12)=Indicator(1)<br>/CONTRAST (edu_grob)=Indicator(1)<br>/CONTRAST (health_job)=Indicator(1)<br>/CONTRAST (research_exp)=Indicator(1)<br>/CONTRAST (nat_dicho)=Indicator(1)<br>/PRINT=GOODFIT<br>/CRITERIA=PIN(0.05) POUT(0.10) ITERATE(20) CUT(0.5). |                                                    |

**Case Processing Summary**

| Unweighted Cases <sup>a</sup> |                      | N   | Percent |
|-------------------------------|----------------------|-----|---------|
| Selected Cases                | Included in Analysis | 193 | 94,6    |
|                               | Missing Cases        | 11  | 5,4     |
|                               | Total                | 204 | 100,0   |
| Unselected Cases              |                      | 0   | 0,0     |
| Total                         |                      | 204 | 100,0   |

a. If weight is in effect, see classification table for the total number of cases.

**Dependent Variable Encoding**

| Original Value | Internal Value |
|----------------|----------------|
| 0 no           | 0              |
| 1 yes          | 1              |

### Categorical Variables Codings

|                                                                             |                                    | Frequency | Parameter coding |       |       |       |       |       |
|-----------------------------------------------------------------------------|------------------------------------|-----------|------------------|-------|-------|-------|-------|-------|
|                                                                             |                                    |           | (1)              | (2)   | (3)   | (4)   | (5)   | (6)   |
| age_gr age-groups (steps of 10 years)                                       | 1 18-29                            | 31        | 0,000            | 0,000 | 0,000 | 0,000 | 0,000 | 0,000 |
|                                                                             | 2 30-39                            | 18        | 1,000            | 0,000 | 0,000 | 0,000 | 0,000 | 0,000 |
|                                                                             | 3 40-49                            | 33        | 0,000            | 1,000 | 0,000 | 0,000 | 0,000 | 0,000 |
|                                                                             | 4 50-59                            | 46        | 0,000            | 0,000 | 1,000 | 0,000 | 0,000 | 0,000 |
|                                                                             | 5 60-69                            | 22        | 0,000            | 0,000 | 0,000 | 1,000 | 0,000 | 0,000 |
|                                                                             | 6 70-79                            | 31        | 0,000            | 0,000 | 0,000 | 0,000 | 1,000 | 0,000 |
|                                                                             | 7 80 oder älter                    | 12        | 0,000            | 0,000 | 0,000 | 0,000 | 0,000 | 1,000 |
| edu_grob school education (low - middle - high)                             | 1 low (kein Abschluss/Hauptschule) | 24        | 0,000            | 0,000 | 0,000 |       |       |       |
|                                                                             | 2 middle (Realschule)              | 46        | 1,000            | 0,000 | 0,000 |       |       |       |
|                                                                             | 3 high ((Fach)-Abitur)             | 113       | 0,000            | 1,000 | 0,000 |       |       |       |
|                                                                             | 8 other/still going to school      | 10        | 0,000            | 0,000 | 1,000 |       |       |       |
| var_3dicho assessment of genetic research (approve - disapprove - not sure) | 0 disapprove (somewhat/definitely) | 33        | 1,000            | 0,000 |       |       |       |       |
|                                                                             | 1 approve (somewhat/definitely)    | 121       | 0,000            | 1,000 |       |       |       |       |
|                                                                             | 3 not sure                         | 39        | 0,000            | 0,000 |       |       |       |       |
| health_job have you ever worked in the health care-sector?                  | 0 no, never                        | 155       | 0,000            |       |       |       |       |       |
|                                                                             | 1 yes, currently/before            | 38        | 1,000            |       |       |       |       |       |
| research_exp have you ever participated in research?                        | 0 no                               | 165       | 0,000            |       |       |       |       |       |
|                                                                             | 1 yes                              | 28        | 1,000            |       |       |       |       |       |
| Var_12 gender                                                               | 1 male                             | 82        | 0,000            |       |       |       |       |       |
|                                                                             | 2 female                           | 111       | 1,000            |       |       |       |       |       |
| nat_dicho nationality (binary coding)                                       | 1 only German                      | 178       | 0,000            |       |       |       |       |       |
|                                                                             | 2 German & other / only other      | 15        | 1,000            |       |       |       |       |       |

### Block 0: Beginning Block

Classification Table<sup>a,b</sup>

| Observed           | var_9adicho ever heard of biobanks before (0/1-coding) |       | Predicted |       | Percentage Correct |
|--------------------|--------------------------------------------------------|-------|-----------|-------|--------------------|
|                    |                                                        |       | 0 no      | 1 yes |                    |
| Step 0             | var_9adicho ever heard of biobanks before (0/1-coding) | 0 no  | 133       | 0     | 100,0              |
|                    |                                                        | 1 yes | 60        | 0     | 0,0                |
| Overall Percentage |                                                        |       |           |       | 68,9               |

a. Constant is included in the model.

b. The cut value is ,500

### Variables in the Equation

|        |          | B      | S.E.  | Wald   | df | Sig.  | Exp(B) |
|--------|----------|--------|-------|--------|----|-------|--------|
| Step 0 | Constant | -0,796 | 0,156 | 26,199 | 1  | 0,000 | 0,451  |

### Variables not in the Equation

|        |                    |                                                                     | Score  | df | Sig.  |
|--------|--------------------|---------------------------------------------------------------------|--------|----|-------|
| Step 0 | Variables          | assessment of genetic research (approve - disapprove - not sure)    | 0,300  | 2  | 0,861 |
|        |                    | assessment of genetic research (approve - disapprove - not sure)(1) | 0,270  | 1  | 0,603 |
|        |                    | assessment of genetic research (approve - disapprove - not sure)(2) | 0,198  | 1  | 0,656 |
|        |                    | age-groups (steps of 10 years)                                      | 3,571  | 6  | 0,735 |
|        |                    | age-groups (steps of 10 years)(1)                                   | 0,047  | 1  | 0,829 |
|        |                    | age-groups (steps of 10 years)(2)                                   | 0,270  | 1  | 0,603 |
|        |                    | age-groups (steps of 10 years)(3)                                   | 1,823  | 1  | 0,177 |
|        |                    | age-groups (steps of 10 years)(4)                                   | 0,323  | 1  | 0,570 |
|        |                    | age-groups (steps of 10 years)(5)                                   | 0,073  | 1  | 0,787 |
|        |                    | age-groups (steps of 10 years)(6)                                   | 1,242  | 1  | 0,265 |
|        |                    | gender(1)                                                           | 0,225  | 1  | 0,635 |
|        |                    | school education (low - middle - high)                              | 12,276 | 3  | 0,006 |
|        |                    | school education (low - middle - high)(1)                           | 0,705  | 1  | 0,401 |
|        |                    | school education (low - middle - high)(2)                           | 4,704  | 1  | 0,030 |
|        |                    | school education (low - middle - high)(3)                           | 1,761  | 1  | 0,185 |
|        |                    | have you ever worked in the health care-sector?(1)                  | 0,215  | 1  | 0,643 |
|        |                    | have you ever participated in research?(1)                          | 2,118  | 1  | 0,146 |
|        |                    | nationality (binary coding)(1)                                      | 0,603  | 1  | 0,437 |
|        | Overall Statistics |                                                                     | 19,756 | 15 | 0,182 |



**Block 1: Method = Forward Stepwise (Wald)**

**Omnibus Tests of Model Coefficients**

|        |       | Chi-square | df | Sig.  |
|--------|-------|------------|----|-------|
| Step 1 | Step  | 15,138     | 3  | 0,002 |
|        | Block | 15,138     | 3  | 0,002 |
|        | Model | 15,138     | 3  | 0,002 |

**Model Summary**

| Step | -2 Log likelihood    | Cox & Snell R Square | Nagelkerke R Square |
|------|----------------------|----------------------|---------------------|
| 1    | 224,106 <sup>a</sup> | 0,075                | 0,106               |

a. Estimation terminated at iteration number 6 because parameter estimates changed by less than ,001.

**Hosmer and Lemeshow Test**

| Step | Chi-square | df | Sig.  |
|------|------------|----|-------|
| 1    | 0,000      | 2  | 1,000 |

**Contingency Table for Hosmer and Lemeshow Test**

| Step 1 |    | var_9adicho ever heard of biobanks before (0/1-coding) = 0 no |          | var_9adicho ever heard of biobanks before (0/1-coding) = 1 yes |          | Total |
|--------|----|---------------------------------------------------------------|----------|----------------------------------------------------------------|----------|-------|
|        |    | Observed                                                      | Expected | Observed                                                       | Expected |       |
|        |    | 1                                                             | 23       | 23,000                                                         | 1        |       |
| 2      | 34 | 34,000                                                        | 12       | 12,000                                                         | 46       |       |
| 3      | 71 | 71,000                                                        | 42       | 42,000                                                         | 113      |       |
| 4      | 5  | 5,000                                                         | 5        | 5,000                                                          | 10       |       |

**Classification Table<sup>a</sup>**

| Observed           | var_9adicho ever heard of biobanks before (0/1-coding) | Predicted                                                     |                                                                | Percentage Correct |
|--------------------|--------------------------------------------------------|---------------------------------------------------------------|----------------------------------------------------------------|--------------------|
|                    |                                                        | var_9adicho ever heard of biobanks before (0/1-coding) = 0 no | var_9adicho ever heard of biobanks before (0/1-coding) = 1 yes |                    |
| Step 1             | 0 no                                                   | 128                                                           | 5                                                              | 96,2               |
|                    | 1 yes                                                  | 55                                                            | 5                                                              | 8,3                |
| Overall Percentage |                                                        |                                                               |                                                                | 68,9               |

a. The cut value is ,500

### Variables in the Equation

|                     |                                           | B      | S.E.  | Wald  | df | Sig.  | Exp(B) |
|---------------------|-------------------------------------------|--------|-------|-------|----|-------|--------|
| Step 1 <sup>a</sup> | school education (low - middle - high)    |        |       | 8,726 | 3  | 0,033 |        |
|                     | school education (low - middle - high)(1) | 2,094  | 1,075 | 3,793 | 1  | 0,051 | 8,118  |
|                     | school education (low - middle - high)(2) | 2,610  | 1,040 | 6,302 | 1  | 0,012 | 13,606 |
|                     | school education (low - middle - high)(3) | 3,135  | 1,201 | 6,811 | 1  | 0,009 | 23,000 |
|                     | Constant                                  | -3,135 | 1,022 | 9,422 | 1  | 0,002 | 0,043  |

a. Variable(s) entered on step 1: school education (low - middle - high).

### Variables not in the Equation

|                    |           |                                                                     | Score | df    | Sig.  |
|--------------------|-----------|---------------------------------------------------------------------|-------|-------|-------|
| Step 1             | Variables | assessment of genetic research (approve - disapprove - not sure)    | 0,761 | 2     | 0,683 |
|                    |           | assessment of genetic research (approve - disapprove - not sure)(1) | 0,667 | 1     | 0,414 |
|                    |           | assessment of genetic research (approve - disapprove - not sure)(2) | 0,068 | 1     | 0,794 |
|                    |           | age-groups (steps of 10 years)                                      | 5,066 | 6     | 0,535 |
|                    |           | age-groups (steps of 10 years)(1)                                   | 0,036 | 1     | 0,850 |
|                    |           | age-groups (steps of 10 years)(2)                                   | 0,402 | 1     | 0,526 |
|                    |           | age-groups (steps of 10 years)(3)                                   | 2,476 | 1     | 0,116 |
|                    |           | age-groups (steps of 10 years)(4)                                   | 0,567 | 1     | 0,451 |
|                    |           | age-groups (steps of 10 years)(5)                                   | 0,085 | 1     | 0,770 |
|                    |           | age-groups (steps of 10 years)(6)                                   | 1,003 | 1     | 0,317 |
|                    |           | gender(1)                                                           | 0,419 | 1     | 0,517 |
|                    |           | have you ever worked in the health care-sector?(1)                  | 0,121 | 1     | 0,728 |
|                    |           | have you ever participated in research?(1)                          | 0,806 | 1     | 0,369 |
|                    |           | nationality (binary coding)(1)                                      | 0,184 | 1     | 0,668 |
| Overall Statistics |           | 8,146                                                               | 12    | 0,774 |       |

## Logistic Regression; dependent variable: "assessment of biobanks"

Method: ENTER

### Notes

|                                |                                                                                                                                                                                                                                                                                                                                                                                                                                                                                                                                  |                                                    |
|--------------------------------|----------------------------------------------------------------------------------------------------------------------------------------------------------------------------------------------------------------------------------------------------------------------------------------------------------------------------------------------------------------------------------------------------------------------------------------------------------------------------------------------------------------------------------|----------------------------------------------------|
| Output Created                 | I-2017 13:14:04                                                                                                                                                                                                                                                                                                                                                                                                                                                                                                                  |                                                    |
| Comments                       |                                                                                                                                                                                                                                                                                                                                                                                                                                                                                                                                  |                                                    |
| N of Rows in Working Data File | 204                                                                                                                                                                                                                                                                                                                                                                                                                                                                                                                              |                                                    |
| Missing Value Handling         | Definition of Missing                                                                                                                                                                                                                                                                                                                                                                                                                                                                                                            | User-defined missing values are treated as missing |
| Syntax                         | LOGISTIC REGRESSION VARIABLES var_8dicho<br>/METHOD=ENTER var_3dicho age_gr Var_12 edu_grob health_job research_exp nat_dicho var_9adicho<br>/CONTRAST (var_3dicho)=Indicator<br>/CONTRAST (age_gr)=Indicator(1)<br>/CONTRAST (Var_12)=Indicator(1)<br>/CONTRAST (edu_grob)=Indicator(1)<br>/CONTRAST (health_job)=Indicator(1)<br>/CONTRAST (research_exp)=Indicator(1)<br>/CONTRAST (nat_dicho)=Indicator(1)<br>/CONTRAST (var_9adicho)=Indicator(1)<br>/PRINT=GOODFIT<br>/CRITERIA=PIN(0.05) POUT(0.10) ITERATE(20) CUT(0.5). |                                                    |
| Resources                      | Processor Time                                                                                                                                                                                                                                                                                                                                                                                                                                                                                                                   | 00:00:00,05                                        |
|                                | Elapsed Time                                                                                                                                                                                                                                                                                                                                                                                                                                                                                                                     | 00:00:00,04                                        |

### Case Processing Summary

| Unweighted Cases <sup>a</sup> |                      | N   | Percent |
|-------------------------------|----------------------|-----|---------|
| Selected Cases                | Included in Analysis | 165 | 80,9    |
|                               | Missing Cases        | 39  | 19,1    |
|                               | Total                | 204 | 100,0   |
| Unselected Cases              |                      | 0   | 0,0     |
| Total                         |                      | 204 | 100,0   |

a. If weight is in effect, see classification table for the total number of cases.

### Dependent Variable Encoding

| Original Value                 | Internal Value |
|--------------------------------|----------------|
| 1 definitely/somewhat positive | 0              |
| 2 definitely/somewhat negative | 1              |

### Categorical Variables Codings

|                                                                             |                                    | Frequency | Parameter coding |       |       |       |       |       |
|-----------------------------------------------------------------------------|------------------------------------|-----------|------------------|-------|-------|-------|-------|-------|
|                                                                             |                                    |           | (1)              | (2)   | (3)   | (4)   | (5)   | (6)   |
| age_gr age-groups (steps of 10 years)                                       | 1 18-29                            | 26        | 0,000            | 0,000 | 0,000 | 0,000 | 0,000 | 0,000 |
|                                                                             | 2 30-39                            | 15        | 1,000            | 0,000 | 0,000 | 0,000 | 0,000 | 0,000 |
|                                                                             | 3 40-49                            | 25        | 0,000            | 1,000 | 0,000 | 0,000 | 0,000 | 0,000 |
|                                                                             | 4 50-59                            | 43        | 0,000            | 0,000 | 1,000 | 0,000 | 0,000 | 0,000 |
|                                                                             | 5 60-69                            | 17        | 0,000            | 0,000 | 0,000 | 1,000 | 0,000 | 0,000 |
|                                                                             | 6 70-79                            | 27        | 0,000            | 0,000 | 0,000 | 0,000 | 1,000 | 0,000 |
|                                                                             | 7 80 oder älter                    | 12        | 0,000            | 0,000 | 0,000 | 0,000 | 0,000 | 1,000 |
| edu_grob school education (low - middle - high)                             | 1 low (kein Abschluss/Hauptschule) | 19        | 0,000            | 0,000 | 0,000 |       |       |       |
|                                                                             | 2 middle (Realschule)              | 40        | 1,000            | 0,000 | 0,000 |       |       |       |
|                                                                             | 3 high ((Fach)-Abitur)             | 96        | 0,000            | 1,000 | 0,000 |       |       |       |
|                                                                             | 8 other/still going to school      | 10        | 0,000            | 0,000 | 1,000 |       |       |       |
| var_3dicho assessment of genetic research (approve - disapprove - not sure) | 0 disapprove (somewhat/definitely) | 21        | 1,000            | 0,000 |       |       |       |       |
|                                                                             | 1 approve (somewhat/definitely)    | 110       | 0,000            | 1,000 |       |       |       |       |
|                                                                             | 3 not sure                         | 34        | 0,000            | 0,000 |       |       |       |       |
| health_job have you ever worked in the health care-sector?                  | 0 no, never                        | 132       | 0,000            |       |       |       |       |       |
|                                                                             | 1 yes, currently/before            | 33        | 1,000            |       |       |       |       |       |
| nat_dicho nationality (binary coding)                                       | 1 only German                      | 151       | 0,000            |       |       |       |       |       |
|                                                                             | 2 German & other / only other      | 14        | 1,000            |       |       |       |       |       |
| Var_12 gender                                                               | 1 male                             | 76        | 0,000            |       |       |       |       |       |
|                                                                             | 2 female                           | 89        | 1,000            |       |       |       |       |       |
| research_exp have you ever participated in research?                        | 0 no                               | 139       | 0,000            |       |       |       |       |       |
|                                                                             | 1 yes                              | 26        | 1,000            |       |       |       |       |       |
| var_9adicho ever heard of biobanks before (0/1-coding)                      | 0 no                               | 108       | 0,000            |       |       |       |       |       |
|                                                                             | 1 yes                              | 57        | 1,000            |       |       |       |       |       |

### Block 0: Beginning Block

Classification Table<sup>a,b</sup>

| Observed | var_8dicho spontaneous assessment of biobanks (positive - negative - not sure) |  | Predicted                                                                      |                                | Percentage Correct |
|----------|--------------------------------------------------------------------------------|--|--------------------------------------------------------------------------------|--------------------------------|--------------------|
|          |                                                                                |  | var_8dicho spontaneous assessment of biobanks (positive - negative - not sure) | Percentage Correct             |                    |
|          |                                                                                |  | 1 definitely/somewhat positive                                                 | 2 definitely/somewhat negative |                    |
| Step 0   | 1 definitely/somewhat positive                                                 |  | 155                                                                            | 0                              | 100,0              |
|          | 2 definitely/somewhat negative                                                 |  | 10                                                                             | 0                              | 0,0                |
|          | Overall Percentage                                                             |  |                                                                                |                                | 93,9               |

a. Constant is included in the model.

b. The cut value is ,500

**Variables in the Equation**

|        |          | B      | S.E.  | Wald   | df | Sig.  | Exp(B) |
|--------|----------|--------|-------|--------|----|-------|--------|
| Step 0 | Constant | -2,741 | 0,326 | 70,569 | 1  | 0,000 | 0,065  |

**Variables not in the Equation**

|        |                    |                                                                     | Score  | df | Sig.  |
|--------|--------------------|---------------------------------------------------------------------|--------|----|-------|
| Step 0 | Variables          | assessment of genetic research (approve - disapprove - not sure)    | 13,336 | 2  | 0,001 |
|        |                    | assessment of genetic research (approve - disapprove - not sure)(1) | 13,314 | 1  | 0,000 |
|        |                    | assessment of genetic research (approve - disapprove - not sure)(2) | 3,406  | 1  | 0,065 |
|        |                    | age-groups (steps of 10 years)                                      | 7,775  | 6  | 0,255 |
|        |                    | age-groups (steps of 10 years)(1)                                   | 0,011  | 1  | 0,918 |
|        |                    | age-groups (steps of 10 years)(2)                                   | 0,195  | 1  | 0,659 |
|        |                    | age-groups (steps of 10 years)(3)                                   | 0,086  | 1  | 0,770 |
|        |                    | age-groups (steps of 10 years)(4)                                   | 4,469  | 1  | 0,035 |
|        |                    | age-groups (steps of 10 years)(5)                                   | 2,083  | 1  | 0,149 |
|        |                    | age-groups (steps of 10 years)(6)                                   | 0,117  | 1  | 0,732 |
|        |                    | gender(1)                                                           | 0,066  | 1  | 0,797 |
|        |                    | school education (low - middle - high)                              | 3,260  | 3  | 0,353 |
|        |                    | school education (low - middle - high)(1)                           | 1,176  | 1  | 0,278 |
|        |                    | school education (low - middle - high)(2)                           | 2,083  | 1  | 0,149 |
|        |                    | school education (low - middle - high)(3)                           | 0,290  | 1  | 0,590 |
|        |                    | have you ever worked in the health care-sector?(1)                  | 0,665  | 1  | 0,415 |
|        |                    | have you ever participated in research?(1)                          | 0,144  | 1  | 0,704 |
|        |                    | nationality (binary coding)(1)                                      | 1,818  | 1  | 0,178 |
|        |                    | ever heard of biobanks before (0/1-coding)(1)                       | 1,124  | 1  | 0,289 |
|        | Overall Statistics |                                                                     | 23,344 | 16 | 0,105 |

**Block 1: Method = Enter**

**Omnibus Tests of Model Coefficients**

| Step   |       | Chi-square | df | Sig.  |
|--------|-------|------------|----|-------|
| Step 1 | Step  | 24,098     | 16 | 0,087 |
|        | Block | 24,098     | 16 | 0,087 |
|        | Model | 24,098     | 16 | 0,087 |

**Model Summary**

| Step | -2 Log likelihood   | Cox & Snell R | Nagelkerke R |
|------|---------------------|---------------|--------------|
| 1    | 51,350 <sup>a</sup> | 0,136         | 0,370        |

a. Estimation terminated at iteration number 20 because maximum iterations has been reached.

**Hosmer and Lemeshow Test**

| Step | Chi-square | df | Sig.  |
|------|------------|----|-------|
| 1    | 3,320      | 8  | 0,913 |

**Contingency Table for Hosmer and Lemeshow Test**

| Step   |    | var_8dicho spontaneous |          | var_8dicho spontaneous |          | Total |
|--------|----|------------------------|----------|------------------------|----------|-------|
|        |    | Observed               | Expected | Observed               | Expected |       |
| Step 1 | 1  | 17                     | 17,000   | 0                      | 0,000    | 17    |
|        | 2  | 17                     | 17,000   | 0                      | 0,000    | 17    |
|        | 3  | 17                     | 17,000   | 0                      | 0,000    | 17    |
|        | 4  | 16                     | 15,987   | 0                      | 0,013    | 16    |
|        | 5  | 17                     | 16,826   | 0                      | 0,174    | 17    |
|        | 6  | 16                     | 16,589   | 1                      | 0,411    | 17    |
|        | 7  | 16                     | 16,343   | 1                      | 0,657    | 17    |
|        | 8  | 18                     | 16,699   | 0                      | 1,301    | 18    |
|        | 9  | 13                     | 14,147   | 4                      | 2,853    | 17    |
|        | 10 | 8                      | 7,409    | 4                      | 4,591    | 12    |

**Classification Table<sup>a</sup>**

| Observed           |                                                                                | Predicted<br>var_8dicho spontaneous assessment of biobanks<br>(positive - negative - not sure) |                                | Percentage<br>Correct |
|--------------------|--------------------------------------------------------------------------------|------------------------------------------------------------------------------------------------|--------------------------------|-----------------------|
|                    |                                                                                | 1 definitely/somewhat positive                                                                 | 2 definitely/somewhat negative |                       |
| Step 1             | var_8dicho spontaneous assessment of biobanks (positive - negative - not sure) | 1 definitely/somewhat positive                                                                 | 154                            | 99,4                  |
|                    |                                                                                | 2 definitely/somewhat negative                                                                 | 9                              | 10,0                  |
| Overall Percentage |                                                                                |                                                                                                |                                | 93,9                  |

a. The cut value is ,500

## Variables in the Equation

|                     |                                                                     | B       | S.E.      | Wald  | df | Sig.  | Exp(B)        |
|---------------------|---------------------------------------------------------------------|---------|-----------|-------|----|-------|---------------|
| Step 1 <sup>a</sup> | assessment of genetic research (approve - disapprove - not sure)    |         |           | 6,722 | 2  | 0,035 |               |
|                     | assessment of genetic research (approve - disapprove - not sure)(1) | 2,252   | 1,413     | 2,542 | 1  | 0,111 | 9,508         |
|                     | assessment of genetic research (approve - disapprove - not sure)(2) | -0,292  | 1,312     | 0,050 | 1  | 0,824 | 0,746         |
|                     | age-groups (steps of 10 years)                                      |         |           | 1,805 | 6  | 0,937 |               |
|                     | age-groups (steps of 10 years)(1)                                   | 18,893  | 7426,423  | 0,000 | 1  | 0,998 | 160418887,573 |
|                     | age-groups (steps of 10 years)(2)                                   | 18,514  | 7426,423  | 0,000 | 1  | 0,998 | 109791003,304 |
|                     | age-groups (steps of 10 years)(3)                                   | 18,470  | 7426,423  | 0,000 | 1  | 0,998 | 105045911,031 |
|                     | age-groups (steps of 10 years)(4)                                   | 19,637  | 7426,423  | 0,000 | 1  | 0,998 | 337328226,188 |
|                     | age-groups (steps of 10 years)(5)                                   | 0,098   | 9989,762  | 0,000 | 1  | 1,000 | 1,103         |
|                     | age-groups (steps of 10 years)(6)                                   | 18,091  | 7426,423  | 0,000 | 1  | 0,998 | 71928610,676  |
|                     | gender(1)                                                           | 0,165   | 0,850     | 0,038 | 1  | 0,846 | 1,180         |
|                     | school education (low - middle - high)                              |         |           | 1,444 | 3  | 0,695 |               |
|                     | school education (low - middle - high)(1)                           | 17,162  | 7850,261  | 0,000 | 1  | 0,998 | 28417002,799  |
|                     | school education (low - middle - high)(2)                           | 18,632  | 7850,261  | 0,000 | 1  | 0,998 | 123580746,167 |
|                     | school education (low - middle - high)(3)                           | 18,497  | 7850,261  | 0,000 | 1  | 0,998 | 107905731,828 |
|                     | have you ever worked in the health care-sector?(1)                  | 1,403   | 0,990     | 2,010 | 1  | 0,156 | 4,068         |
|                     | have you ever participated in research?(1)                          | 0,241   | 1,094     | 0,048 | 1  | 0,826 | 1,272         |
|                     | nationality (binary coding)(1)                                      | 0,051   | 1,075     | 0,002 | 1  | 0,962 | 1,053         |
|                     | ever heard of biobanks before (0/1-coding)(1)                       | 0,730   | 0,781     | 0,874 | 1  | 0,350 | 2,075         |
|                     | Constant                                                            | -40,633 | 10806,403 | 0,000 | 1  | 0,997 | 0,000         |

a. Variable(s) entered on step 1: assessment of genetic research (approve - disapprove - not sure), age-groups (steps of 10 years), gender, school education (low - middle - high), have you ever worked in the health care-sector?, have you ever participated in research?, nationality (binary coding), ever heard of biobanks before (0/1-coding).

**Logistic Regression; dependent variable: "assessment of biobanks"**  
**Method: Forward Stepwise (Wald)**

**Notes**

|                        |                                |                                                                                                                                                                                                                                                                                                                                                                                                                                                                                                                                         |
|------------------------|--------------------------------|-----------------------------------------------------------------------------------------------------------------------------------------------------------------------------------------------------------------------------------------------------------------------------------------------------------------------------------------------------------------------------------------------------------------------------------------------------------------------------------------------------------------------------------------|
| Output Created         |                                | I-2017 13:14:04                                                                                                                                                                                                                                                                                                                                                                                                                                                                                                                         |
|                        | N of Rows in Working Data File | 204                                                                                                                                                                                                                                                                                                                                                                                                                                                                                                                                     |
| Missing Value Handling | Definition of Missing          | User-defined missing values are treated as missing                                                                                                                                                                                                                                                                                                                                                                                                                                                                                      |
| Syntax                 |                                | LOGISTIC REGRESSION VARIABLES var_8dicho<br>/METHOD=FWSTEP(WALD) var_3dicho age_gr Var_12 edu_grob health_job research_exp nat_dicho var_9adicho<br>/CONTRAST (var_3dicho)=Indicator<br>/CONTRAST (age_gr)=Indicator(1)<br>/CONTRAST (Var_12)=Indicator(1)<br>/CONTRAST (edu_grob)=Indicator(1)<br>/CONTRAST (health_job)=Indicator(1)<br>/CONTRAST (research_exp)=Indicator(1)<br>/CONTRAST (nat_dicho)=Indicator(1)<br>/CONTRAST (var_9adicho)=Indicator(1)<br>/PRINT=GOODFIT<br>/CRITERIA=PIN(0.05) POUT(0.10) ITERATE(20) CUT(0.5). |
| Resources              | Processor Time                 | 00:00:00,03                                                                                                                                                                                                                                                                                                                                                                                                                                                                                                                             |
|                        | Elapsed Time                   | 00:00:00,03                                                                                                                                                                                                                                                                                                                                                                                                                                                                                                                             |

**Case Processing Summary**

| Unweighted Cases <sup>a</sup> |                      | N   | Percent |
|-------------------------------|----------------------|-----|---------|
| Selected Cases                | Included in Analysis | 165 | 80,9    |
|                               | Missing Cases        | 39  | 19,1    |
|                               | Total                | 204 | 100,0   |
| Unselected Cases              |                      | 0   | 0,0     |
| Total                         |                      | 204 | 100,0   |

a. If weight is in effect, see classification table for the total number of cases.

**Dependent Variable Encoding**

| Original Value                 | Internal Value |
|--------------------------------|----------------|
| 1 definitely/somewhat positive | 0              |
| 2 definitely/somewhat negative | 1              |



### Categorical Variables Codings

|                                                                             |                                    | Frequency | Parameter coding |       |       |       |       |       |
|-----------------------------------------------------------------------------|------------------------------------|-----------|------------------|-------|-------|-------|-------|-------|
|                                                                             |                                    |           | (1)              | (2)   | (3)   | (4)   | (5)   | (6)   |
| age_gr age-groups (steps of 10 years)                                       | 1 18-29                            | 26        | 0,000            | 0,000 | 0,000 | 0,000 | 0,000 | 0,000 |
|                                                                             | 2 30-39                            | 15        | 1,000            | 0,000 | 0,000 | 0,000 | 0,000 | 0,000 |
|                                                                             | 3 40-49                            | 25        | 0,000            | 1,000 | 0,000 | 0,000 | 0,000 | 0,000 |
|                                                                             | 4 50-59                            | 43        | 0,000            | 0,000 | 1,000 | 0,000 | 0,000 | 0,000 |
|                                                                             | 5 60-69                            | 17        | 0,000            | 0,000 | 0,000 | 1,000 | 0,000 | 0,000 |
|                                                                             | 6 70-79                            | 27        | 0,000            | 0,000 | 0,000 | 0,000 | 1,000 | 0,000 |
|                                                                             | 7 80 oder älter                    | 12        | 0,000            | 0,000 | 0,000 | 0,000 | 0,000 | 1,000 |
| edu_grob school education (low - middle - high)                             | 1 low (kein Abschluss/Hauptschule) | 19        | 0,000            | 0,000 | 0,000 |       |       |       |
|                                                                             | 2 middle (Realschule)              | 40        | 1,000            | 0,000 | 0,000 |       |       |       |
|                                                                             | 3 high ((Fach)-Abitur)             | 96        | 0,000            | 1,000 | 0,000 |       |       |       |
|                                                                             | 8 other/still going to school      | 10        | 0,000            | 0,000 | 1,000 |       |       |       |
| var_3dicho assessment of genetic research (approve - disapprove - not sure) | 0 disapprove (somewhat/definitely) | 21        | 1,000            | 0,000 |       |       |       |       |
|                                                                             | 1 approve (somewhat/definitely)    | 110       | 0,000            | 1,000 |       |       |       |       |
|                                                                             | 3 not sure                         | 34        | 0,000            | 0,000 |       |       |       |       |
| health_job have you ever worked in the health care-sector?                  | 0 no, never                        | 132       | 0,000            |       |       |       |       |       |
|                                                                             | 1 yes, currently/before            | 33        | 1,000            |       |       |       |       |       |
| nat_dicho nationality (binary coding)                                       | 1 only German                      | 151       | 0,000            |       |       |       |       |       |
|                                                                             | 2 German & other / only other      | 14        | 1,000            |       |       |       |       |       |
| Var_12 gender                                                               | 1 male                             | 76        | 0,000            |       |       |       |       |       |
|                                                                             | 2 female                           | 89        | 1,000            |       |       |       |       |       |
| research_exp have you ever participated in research?                        | 0 no                               | 139       | 0,000            |       |       |       |       |       |
|                                                                             | 1 yes                              | 26        | 1,000            |       |       |       |       |       |
| var_9adicho ever heard of biobanks before (0/1-coding)                      | 0 no                               | 108       | 0,000            |       |       |       |       |       |
|                                                                             | 1 yes                              | 57        | 1,000            |       |       |       |       |       |

### Block 0: Beginning Block

Classification Table<sup>a,b</sup>

| Observed           | var_8dicho spontaneous assessment of biobanks (positive - negative - not sure) | Predicted                                                                      |                                                                                | Percentage Correct |
|--------------------|--------------------------------------------------------------------------------|--------------------------------------------------------------------------------|--------------------------------------------------------------------------------|--------------------|
|                    |                                                                                | var_8dicho spontaneous assessment of biobanks (positive - negative - not sure) | var_8dicho spontaneous assessment of biobanks (positive - negative - not sure) |                    |
|                    |                                                                                | 1 definitely/somewhat positive                                                 | 2 definitely/somewhat negative                                                 |                    |
| Step 0             | 1 definitely/somewhat positive                                                 | 155                                                                            | 0                                                                              | 100,0              |
|                    | 2 definitely/somewhat negative                                                 | 10                                                                             | 0                                                                              | 0,0                |
| Overall Percentage |                                                                                |                                                                                |                                                                                | 93,9               |

a. Constant is included in the model.

b. The cut value is ,500

### Variables in the Equation

|        |          | B      | S.E.  | Wald   | df | Sig.  | Exp(B) |
|--------|----------|--------|-------|--------|----|-------|--------|
| Step 0 | Constant | -2,741 | 0,326 | 70,569 | 1  | 0,000 | 0,065  |

### Variables not in the Equation

|        |                    |                                                                     | Score  | df | Sig.  |
|--------|--------------------|---------------------------------------------------------------------|--------|----|-------|
| Step 0 | Variables          | assessment of genetic research (approve - disapprove - not sure)    | 13,336 | 2  | 0,001 |
|        |                    | assessment of genetic research (approve - disapprove - not sure)(1) | 13,314 | 1  | 0,000 |
|        |                    | assessment of genetic research (approve - disapprove - not sure)(2) | 3,406  | 1  | 0,065 |
|        |                    | age-groups (steps of 10 years)                                      | 7,775  | 6  | 0,255 |
|        |                    | age-groups (steps of 10 years)(1)                                   | 0,011  | 1  | 0,918 |
|        |                    | age-groups (steps of 10 years)(2)                                   | 0,195  | 1  | 0,659 |
|        |                    | age-groups (steps of 10 years)(3)                                   | 0,086  | 1  | 0,770 |
|        |                    | age-groups (steps of 10 years)(4)                                   | 4,469  | 1  | 0,035 |
|        |                    | age-groups (steps of 10 years)(5)                                   | 2,083  | 1  | 0,149 |
|        |                    | age-groups (steps of 10 years)(6)                                   | 0,117  | 1  | 0,732 |
|        |                    | gender(1)                                                           | 0,066  | 1  | 0,797 |
|        |                    | school education (low - middle - high)                              | 3,260  | 3  | 0,353 |
|        |                    | school education (low - middle - high)(1)                           | 1,176  | 1  | 0,278 |
|        |                    | school education (low - middle - high)(2)                           | 2,083  | 1  | 0,149 |
|        |                    | school education (low - middle - high)(3)                           | 0,290  | 1  | 0,590 |
|        |                    | have you ever worked in the health care-sector?(1)                  | 0,665  | 1  | 0,415 |
|        |                    | have you ever participated in research?(1)                          | 0,144  | 1  | 0,704 |
|        |                    | nationality (binary coding)(1)                                      | 1,818  | 1  | 0,178 |
|        |                    | ever heard of biobanks before (0/1-coding)(1)                       | 1,124  | 1  | 0,289 |
|        | Overall Statistics |                                                                     | 23,344 | 16 | 0,105 |

### Block 1: Method = Forward Stepwise (Wald)

#### Omnibus Tests of Model Coefficients

|        |       | Chi-square | df | Sig.  |
|--------|-------|------------|----|-------|
| Step 1 | Step  | 9,007      | 2  | 0,011 |
|        | Block | 9,007      | 2  | 0,011 |
|        | Model | 9,007      | 2  | 0,011 |

### Model Summary

| Step | -2 Log likelihood   | Cox & Snell R Square | Nagelkerke R Square |
|------|---------------------|----------------------|---------------------|
| 1    | 66,442 <sup>a</sup> | 0,053                | 0,145               |

a. Estimation terminated at iteration number 6 because parameter estimates changed by less than ,001.

### Hosmer and Lemeshow Test

| Step | Chi-square | df | Sig.  |
|------|------------|----|-------|
| 1    | 0,000      | 1  | 1,000 |

### Contingency Table for Hosmer and Lemeshow Test

|  |   | var_8dicho spontaneous assessment of biobanks (positive - negative - not sure) = 1 definitely/somewhat positive |          | var_8dicho spontaneous assessment of biobanks (positive - negative - not sure) = 2 definitely/somewhat negative |          | Total |
|--|---|-----------------------------------------------------------------------------------------------------------------|----------|-----------------------------------------------------------------------------------------------------------------|----------|-------|
|  |   | Observed                                                                                                        | Expected | Observed                                                                                                        | Expected |       |
|  |   | Step 1                                                                                                          | 1        | 33                                                                                                              | 33,000   |       |
|  | 2 | 106                                                                                                             | 106,000  | 4                                                                                                               | 4,000    | 110   |
|  | 3 | 16                                                                                                              | 16,000   | 5                                                                                                               | 5,000    | 21    |

### Classification Table<sup>a</sup>

| Observed |                                                                                | Predicted var_8dicho spontaneous assessment of biobanks (positive - negative - not sure) |                                | Percentage Correct |       |
|----------|--------------------------------------------------------------------------------|------------------------------------------------------------------------------------------|--------------------------------|--------------------|-------|
|          |                                                                                | 1 definitely/somewhat positive                                                           | 2 definitely/somewhat negative |                    |       |
| Step 1   | var_8dicho spontaneous assessment of biobanks (positive - negative - not sure) | 1 definitely/somewhat positive                                                           | 155                            | 0                  | 100,0 |
|          |                                                                                | 2 definitely/somewhat negative                                                           | 10                             | 0                  | 0,0   |
|          | Overall Percentage                                                             |                                                                                          |                                |                    | 93,9  |

a. The cut value is ,500

### Variables in the Equation

|                     |                                                                     | B      | S.E.  | Wald   | df | Sig.  | Exp(B) |
|---------------------|---------------------------------------------------------------------|--------|-------|--------|----|-------|--------|
| Step 1 <sup>a</sup> | assessment of genetic research (approve - disapprove - not sure)    |        |       | 9,952  | 2  | 0,007 |        |
|                     | assessment of genetic research (approve - disapprove - not sure)(1) | 2,333  | 1,137 | 4,211  | 1  | 0,040 | 10,312 |
|                     | assessment of genetic research (approve - disapprove - not sure)(2) | 0,219  | 1,136 | 0,037  | 1  | 0,847 | 1,245  |
|                     | Constant                                                            | -3,497 | 1,015 | 11,866 | 1  | 0,001 | 0,030  |

a. Variable(s) entered on step 1: assessment of genetic research (approve - disapprove - not sure).

### Variables not in the Equation

|                    |                                                    | Score | df    | Sig.  |
|--------------------|----------------------------------------------------|-------|-------|-------|
| Step 1             | Variables                                          |       |       |       |
|                    | age-groups (steps of 10 years)                     | 5,031 | 6     | 0,540 |
|                    | age-groups (steps of 10 years)(1)                  | 0,499 | 1     | 0,480 |
|                    | age-groups (steps of 10 years)(2)                  | 0,099 | 1     | 0,753 |
|                    | age-groups (steps of 10 years)(3)                  | 0,139 | 1     | 0,709 |
|                    | age-groups (steps of 10 years)(4)                  | 1,809 | 1     | 0,179 |
|                    | age-groups (steps of 10 years)(5)                  | 1,500 | 1     | 0,221 |
|                    | age-groups (steps of 10 years)(6)                  | 0,063 | 1     | 0,802 |
|                    | gender(1)                                          | 0,042 | 1     | 0,838 |
|                    | school education (low - middle - high)             | 3,191 | 3     | 0,363 |
|                    | school education (low - middle - high)(1)          | 0,946 | 1     | 0,331 |
|                    | school education (low - middle - high)(2)          | 2,754 | 1     | 0,097 |
|                    | school education (low - middle - high)(3)          | 0,034 | 1     | 0,853 |
|                    | have you ever worked in the health care-sector?(1) | 1,805 | 1     | 0,179 |
|                    | have you ever participated in research?(1)         | 0,470 | 1     | 0,493 |
|                    | nationality (binary coding)(1)                     | 0,528 | 1     | 0,468 |
|                    | ever heard of biobanks before (0/1-coding)(1)      | 1,723 | 1     | 0,189 |
| Overall Statistics | 11,372                                             | 14    | 0,657 |       |

## Logistic Regression; dependent variable: "hypothetical willingness to donate biomaterial and/or data"

Method: ENTER

### Notes

|                        |                                |                                                                                                                                                                                                                                                                                                                                                                                                                                                                                                                                      |
|------------------------|--------------------------------|--------------------------------------------------------------------------------------------------------------------------------------------------------------------------------------------------------------------------------------------------------------------------------------------------------------------------------------------------------------------------------------------------------------------------------------------------------------------------------------------------------------------------------------|
| Output Created         |                                | I-2017 13:14:04                                                                                                                                                                                                                                                                                                                                                                                                                                                                                                                      |
|                        | N of Rows in Working Data File | 204                                                                                                                                                                                                                                                                                                                                                                                                                                                                                                                                  |
| Missing Value Handling | Definition of Missing          | User-defined missing values are treated as missing                                                                                                                                                                                                                                                                                                                                                                                                                                                                                   |
| Syntax                 |                                | LOGISTIC REGRESSION VARIABLES var_10dicho<br>/METHOD=ENTER var_3dicho age_gr Var_12 edu_grob health_job research_exp<br>nat_dicho var_9adicho<br>/CONTRAST (var_3dicho)=Indicator<br>/CONTRAST (age_gr)=Indicator(1)<br>/CONTRAST (Var_12)=Indicator(1)<br>/CONTRAST (edu_grob)=Indicator(1)<br>/CONTRAST (health_job)=Indicator(1)<br>/CONTRAST (research_exp)=Indicator(1)<br>/CONTRAST (nat_dicho)=Indicator(1)<br>/CONTRAST (var_9adicho)=Indicator(1)<br>/PRINT=GOODFIT<br>/CRITERIA=PIN(0.05) POUT(0.10) ITERATE(20) CUT(0.5). |
| Resources              | Processor Time                 | 00:00:00,03                                                                                                                                                                                                                                                                                                                                                                                                                                                                                                                          |
|                        | Elapsed Time                   | 00:00:00,05                                                                                                                                                                                                                                                                                                                                                                                                                                                                                                                          |

### Case Processing Summary

| Unweighted Cases <sup>a</sup> |                      | N   | Percent |
|-------------------------------|----------------------|-----|---------|
| Selected Cases                | Included in Analysis | 169 | 82,8    |
|                               | Missing Cases        | 35  | 17,2    |
|                               | Total                | 204 | 100,0   |
| Unselected Cases              |                      | 0   | 0,0     |
| Total                         |                      | 204 | 100,0   |

a. If weight is in effect, see classification table for the total number of cases.

### Dependent Variable Encoding

| Original Value                | Internal Value |
|-------------------------------|----------------|
| 0 no (probably/certainly not) | 0              |
| 1 yes (probably/certainly)    | 1              |

### Categorical Variables Codings

|                                                                             |                                    | Frequency | Parameter coding |       |       |       |       |       |
|-----------------------------------------------------------------------------|------------------------------------|-----------|------------------|-------|-------|-------|-------|-------|
|                                                                             |                                    |           | (1)              | (2)   | (3)   | (4)   | (5)   | (6)   |
| age_gr age-groups (steps of 10 years)                                       | 1 18-29                            | 27        | 0,000            | 0,000 | 0,000 | 0,000 | 0,000 | 0,000 |
|                                                                             | 2 30-39                            | 17        | 1,000            | 0,000 | 0,000 | 0,000 | 0,000 | 0,000 |
|                                                                             | 3 40-49                            | 25        | 0,000            | 1,000 | 0,000 | 0,000 | 0,000 | 0,000 |
|                                                                             | 4 50-59                            | 41        | 0,000            | 0,000 | 1,000 | 0,000 | 0,000 | 0,000 |
|                                                                             | 5 60-69                            | 20        | 0,000            | 0,000 | 0,000 | 1,000 | 0,000 | 0,000 |
|                                                                             | 6 70-79                            | 29        | 0,000            | 0,000 | 0,000 | 0,000 | 1,000 | 0,000 |
|                                                                             | 7 80 oder älter                    | 10        | 0,000            | 0,000 | 0,000 | 0,000 | 0,000 | 1,000 |
| edu_grob school education (low - middle - high)                             | 1 low (kein Abschluss/Hauptschule) | 18        | 0,000            | 0,000 | 0,000 |       |       |       |
|                                                                             | 2 middle (Realschule)              | 41        | 1,000            | 0,000 | 0,000 |       |       |       |
|                                                                             | 3 high ((Fach)-Abitur)             | 100       | 0,000            | 1,000 | 0,000 |       |       |       |
|                                                                             | 8 other/still going to school      | 10        | 0,000            | 0,000 | 1,000 |       |       |       |
| var_3dicho assessment of genetic research (approve - disapprove - not sure) | 0 disapprove (somewhat/definitely) | 27        | 1,000            | 0,000 |       |       |       |       |
|                                                                             | 1 approve (somewhat/definitely)    | 111       | 0,000            | 1,000 |       |       |       |       |
|                                                                             | 3 not sure                         | 31        | 0,000            | 0,000 |       |       |       |       |
| health_job have you ever worked in the health care-sector?                  | 0 no, never                        | 132       | 0,000            |       |       |       |       |       |
|                                                                             | 1 yes, currently/before            | 37        | 1,000            |       |       |       |       |       |
| nat_dicho nationality (binary coding)                                       | 1 only German                      | 157       | 0,000            |       |       |       |       |       |
|                                                                             | 2 German & other / only other      | 12        | 1,000            |       |       |       |       |       |
| Var_12 gender                                                               | 1 male                             | 73        | 0,000            |       |       |       |       |       |
|                                                                             | 2 female                           | 96        | 1,000            |       |       |       |       |       |
| research_exp have you ever participated in research?                        | 0 no                               | 142       | 0,000            |       |       |       |       |       |
|                                                                             | 1 yes                              | 27        | 1,000            |       |       |       |       |       |
| var_9adicho ever heard of biobanks before (0/1-coding)                      | 0 no                               | 115       | 0,000            |       |       |       |       |       |
|                                                                             | 1 yes                              | 54        | 1,000            |       |       |       |       |       |

## Block 0: Beginning Block

Classification Table<sup>a,b</sup>

| Observed           | var_10dicho willingness to participate in biobank-research (yes - no - not sure) | Predicted var_10dicho willingness to participate in biobank-research (yes - no - not sure) |                            | Percentage Correct |
|--------------------|----------------------------------------------------------------------------------|--------------------------------------------------------------------------------------------|----------------------------|--------------------|
|                    |                                                                                  | 0 no (probably/certainly not)                                                              | 1 yes (probably/certainly) |                    |
| Step 0             | 0 no (probably/certainly not)                                                    | 0                                                                                          | 34                         | 0,0                |
|                    | 1 yes (probably/certainly)                                                       | 0                                                                                          | 135                        | 100,0              |
| Overall Percentage |                                                                                  |                                                                                            |                            | 79,9               |

a. Constant is included in the model.

b. The cut value is ,500

### Variables in the Equation

|        |          | B     | S.E.  | Wald   | df | Sig.  | Exp(B) |
|--------|----------|-------|-------|--------|----|-------|--------|
| Step 0 | Constant | 1,379 | 0,192 | 51,642 | 1  | 0,000 | 3,971  |

### Variables not in the Equation

|        |                    |                                                                     | Score  | df | Sig.  |
|--------|--------------------|---------------------------------------------------------------------|--------|----|-------|
| Step 0 | Variables          | assessment of genetic research (approve - disapprove - not sure)    | 15,754 | 2  | 0,000 |
|        |                    | assessment of genetic research (approve - disapprove - not sure)(1) | 15,710 | 1  | 0,000 |
|        |                    | assessment of genetic research (approve - disapprove - not sure)(2) | 6,548  | 1  | 0,011 |
|        |                    | age-groups (steps of 10 years)                                      | 11,520 | 6  | 0,074 |
|        |                    | age-groups (steps of 10 years)(1)                                   | 1,016  | 1  | 0,314 |
|        |                    | age-groups (steps of 10 years)(2)                                   | 0,310  | 1  | 0,578 |
|        |                    | age-groups (steps of 10 years)(3)                                   | 1,013  | 1  | 0,314 |
|        |                    | age-groups (steps of 10 years)(4)                                   | 5,580  | 1  | 0,018 |
|        |                    | age-groups (steps of 10 years)(5)                                   | 2,081  | 1  | 0,149 |
|        |                    | age-groups (steps of 10 years)(6)                                   | 2,614  | 1  | 0,106 |
|        |                    | gender(1)                                                           | 3,296  | 1  | 0,069 |
|        |                    | school education (low - middle - high)                              | 1,418  | 3  | 0,701 |
|        |                    | school education (low - middle - high)(1)                           | 1,013  | 1  | 0,314 |
|        |                    | school education (low - middle - high)(2)                           | 1,266  | 1  | 0,261 |
|        |                    | school education (low - middle - high)(3)                           | 0,000  | 1  | 0,992 |
|        |                    | have you ever worked in the health care-sector?(1)                  | 1,407  | 1  | 0,236 |
|        |                    | have you ever participated in research?(1)                          | 0,051  | 1  | 0,821 |
|        |                    | nationality (binary coding)(1)                                      | 1,404  | 1  | 0,236 |
|        |                    | ever heard of biobanks before (0/1-coding)(1)                       | 0,003  | 1  | 0,955 |
|        | Overall Statistics |                                                                     | 31,071 | 16 | 0,013 |

### Block 1: Method = Enter

#### Omnibus Tests of Model Coefficients

|        |       | Chi-square | df | Sig.  |
|--------|-------|------------|----|-------|
| Step 1 | Step  | 29,799     | 16 | 0,019 |
|        | Block | 29,799     | 16 | 0,019 |
|        | Model | 29,799     | 16 | 0,019 |

#### Model Summary

| Step | -2 Log likelihood    | Cox & Snell R Square | Nagelkerke R Square |
|------|----------------------|----------------------|---------------------|
| 1    | 139,890 <sup>a</sup> | 0,162                | 0,255               |

a. Estimation terminated at iteration number 5 because parameter estimates changed by less than ,001.

### Hosmer and Lemeshow Test

| Step | Chi-square | df | Sig.  |
|------|------------|----|-------|
| 1    | 5,030      | 8  | 0,754 |

### Contingency Table for Hosmer and Lemeshow Test

|        |    | var_10dicho willingness to participate in biobank-research (yes - no - not sure) = 0 no (probably/certainly not) |          | var_10dicho willingness to participate in biobank-research (yes - no - not sure) = 1 yes (probably/certainly) |          | Total |
|--------|----|------------------------------------------------------------------------------------------------------------------|----------|---------------------------------------------------------------------------------------------------------------|----------|-------|
|        |    | Observed                                                                                                         | Expected | Observed                                                                                                      | Expected |       |
| Step 1 | 1  | 10                                                                                                               | 10,549   | 7                                                                                                             | 6,451    | 17    |
|        | 2  | 8                                                                                                                | 6,337    | 10                                                                                                            | 11,663   | 18    |
|        | 3  | 4                                                                                                                | 4,612    | 13                                                                                                            | 12,388   | 17    |
|        | 4  | 3                                                                                                                | 3,509    | 14                                                                                                            | 13,491   | 17    |
|        | 5  | 4                                                                                                                | 2,653    | 13                                                                                                            | 14,347   | 17    |
|        | 6  | 3                                                                                                                | 2,051    | 14                                                                                                            | 14,949   | 17    |
|        | 7  | 1                                                                                                                | 1,597    | 16                                                                                                            | 15,403   | 17    |
|        | 8  | 0                                                                                                                | 1,211    | 17                                                                                                            | 15,789   | 17    |
|        | 9  | 0                                                                                                                | 0,885    | 17                                                                                                            | 16,115   | 17    |
|        | 10 | 1                                                                                                                | 0,597    | 14                                                                                                            | 14,403   | 15    |

### Classification Table<sup>a</sup>

| Observed           |                                                                                  | Predicted<br>var_10dicho willingness to participate in biobank-research (yes - no - not sure) |                            | Percentage Correct |      |
|--------------------|----------------------------------------------------------------------------------|-----------------------------------------------------------------------------------------------|----------------------------|--------------------|------|
|                    |                                                                                  | 0 no (probably/certainly not)                                                                 | 1 yes (probably/certainly) |                    |      |
| Step 1             | var_10dicho willingness to participate in biobank-research (yes - no - not sure) | 0 no (probably/certainly not)                                                                 | 8                          | 26                 | 23,5 |
|                    |                                                                                  | 1 yes (probably/certainly)                                                                    | 5                          | 130                | 96,3 |
| Overall Percentage |                                                                                  |                                                                                               |                            | 81,7               |      |

a. The cut value is ,500



## Variables in the Equation

|                     |                                                                     | B      | S.E.  | Wald   | df | Sig.  | Exp(B) |
|---------------------|---------------------------------------------------------------------|--------|-------|--------|----|-------|--------|
| Step 1 <sup>a</sup> | assessment of genetic research (approve - disapprove - not sure)    |        |       | 12,809 | 2  | 0,002 |        |
|                     | assessment of genetic research (approve - disapprove - not sure)(1) | -1,845 | 0,734 | 6,321  | 1  | 0,012 | 0,158  |
|                     | assessment of genetic research (approve - disapprove - not sure)(2) | 0,232  | 0,609 | 0,145  | 1  | 0,703 | 1,261  |
|                     | age-groups (steps of 10 years)                                      |        |       | 7,533  | 6  | 0,274 |        |
|                     | age-groups (steps of 10 years)(1)                                   | -1,009 | 0,832 | 1,471  | 1  | 0,225 | 0,364  |
|                     | age-groups (steps of 10 years)(2)                                   | 0,447  | 0,855 | 0,274  | 1  | 0,601 | 1,564  |
|                     | age-groups (steps of 10 years)(3)                                   | 0,145  | 0,774 | 0,035  | 1  | 0,851 | 1,156  |
|                     | age-groups (steps of 10 years)(4)                                   | -0,955 | 0,789 | 1,466  | 1  | 0,226 | 0,385  |
|                     | age-groups (steps of 10 years)(5)                                   | 0,164  | 0,900 | 0,033  | 1  | 0,856 | 1,178  |
|                     | age-groups (steps of 10 years)(6)                                   | -1,173 | 0,922 | 1,617  | 1  | 0,203 | 0,309  |
|                     | gender(1)                                                           | -0,880 | 0,492 | 3,189  | 1  | 0,074 | 0,415  |
|                     | school education (low - middle - high)                              |        |       | 0,459  | 3  | 0,928 |        |
|                     | school education (low - middle - high)(1)                           | 0,204  | 0,886 | 0,053  | 1  | 0,818 | 1,226  |
|                     | school education (low - middle - high)(2)                           | -0,150 | 0,825 | 0,033  | 1  | 0,856 | 0,861  |
|                     | school education (low - middle - high)(3)                           | 0,217  | 1,202 | 0,033  | 1  | 0,857 | 1,242  |
|                     | have you ever worked in the health care-sector?(1)                  | -0,643 | 0,527 | 1,492  | 1  | 0,222 | 0,525  |
|                     | have you ever participated in research?(1)                          | 0,131  | 0,638 | 0,042  | 1  | 0,837 | 1,140  |
|                     | nationality (binary coding)(1)                                      | -0,417 | 0,745 | 0,313  | 1  | 0,576 | 0,659  |
|                     | ever heard of biobanks before (0/1-coding)(1)                       | 0,011  | 0,481 | 0,001  | 1  | 0,981 | 1,011  |
|                     | Constant                                                            | 2,647  | 1,069 | 6,134  | 1  | 0,013 | 14,114 |

a. Variable(s) entered on step 1: assessment of genetic research (approve - disapprove - not sure), age-groups (steps of 10 years), gender, school education (low - middle - high), have you ever worked in the health care-sector?, have you ever participated in research?, nationality (binary coding), ever heard of biobanks before (0/1-coding).

**Logistic Regression; dependent variable: "hypothetical willingness to donate biomaterial and/or data"**

**Method: Forward Stepwise (Wald)**

**Notes**

|                        |                                |                                                                                                                                                                                                                                                                                                                                                                                                                                                                                                                                             |
|------------------------|--------------------------------|---------------------------------------------------------------------------------------------------------------------------------------------------------------------------------------------------------------------------------------------------------------------------------------------------------------------------------------------------------------------------------------------------------------------------------------------------------------------------------------------------------------------------------------------|
| Output Created         |                                | I-2017 13:14:04                                                                                                                                                                                                                                                                                                                                                                                                                                                                                                                             |
|                        | N of Rows in Working Data File | 204                                                                                                                                                                                                                                                                                                                                                                                                                                                                                                                                         |
| Missing Value Handling | Definition of Missing          | User-defined missing values are treated as missing                                                                                                                                                                                                                                                                                                                                                                                                                                                                                          |
| Syntax                 |                                | LOGISTIC REGRESSION VARIABLES var_10dicho<br>/METHOD=FSSTEP(WALD) var_3dicho age_gr Var_12 edu_grob health_job<br>research_exp nat_dicho var_9adicho<br>/CONTRAST (var_3dicho)=Indicator<br>/CONTRAST (age_gr)=Indicator(1)<br>/CONTRAST (Var_12)=Indicator(1)<br>/CONTRAST (edu_grob)=Indicator(1)<br>/CONTRAST (health_job)=Indicator(1)<br>/CONTRAST (research_exp)=Indicator(1)<br>/CONTRAST (nat_dicho)=Indicator(1)<br>/CONTRAST (var_9adicho)=Indicator(1)<br>/PRINT=GOODFIT<br>/CRITERIA=PIN(0.05) POUT(0.10) ITERATE(20) CUT(0.5). |

**Case Processing Summary**

| Unweighted Cases <sup>a</sup> |                      | N          | Percent      |
|-------------------------------|----------------------|------------|--------------|
| Selected Cases                | Included in Analysis | 169        | 82.8         |
|                               | Missing Cases        | 35         | 17.2         |
|                               | Total                | 204        | 100.0        |
| Unselected Cases              |                      | 0          | 0.0          |
| <b>Total</b>                  |                      | <b>204</b> | <b>100.0</b> |

a. If weight is in effect, see classification table for the total number of cases.

**Dependent Variable Encoding**

| Original Value                | Internal Value |
|-------------------------------|----------------|
| 0 no (probably/certainly not) | 0              |
| 1 yes (probably/certainly)    | 1              |

### Categorical Variables Codings

|                                                                             |                                    | Frequency | Parameter coding |       |       |       |       |       |
|-----------------------------------------------------------------------------|------------------------------------|-----------|------------------|-------|-------|-------|-------|-------|
|                                                                             |                                    |           | (1)              | (2)   | (3)   | (4)   | (5)   | (6)   |
| age_gr age-groups (steps of 10 years)                                       | 1 18-29                            | 27        | 0,000            | 0,000 | 0,000 | 0,000 | 0,000 | 0,000 |
|                                                                             | 2 30-39                            | 17        | 1,000            | 0,000 | 0,000 | 0,000 | 0,000 | 0,000 |
|                                                                             | 3 40-49                            | 25        | 0,000            | 1,000 | 0,000 | 0,000 | 0,000 | 0,000 |
|                                                                             | 4 50-59                            | 41        | 0,000            | 0,000 | 1,000 | 0,000 | 0,000 | 0,000 |
|                                                                             | 5 60-69                            | 20        | 0,000            | 0,000 | 0,000 | 1,000 | 0,000 | 0,000 |
|                                                                             | 6 70-79                            | 29        | 0,000            | 0,000 | 0,000 | 0,000 | 1,000 | 0,000 |
|                                                                             | 7 80 oder älter                    | 10        | 0,000            | 0,000 | 0,000 | 0,000 | 0,000 | 1,000 |
| edu_grob school education (low - middle - high)                             | 1 low (kein Abschluss/Hauptschule) | 18        | 0,000            | 0,000 | 0,000 |       |       |       |
|                                                                             | 2 middle (Realschule)              | 41        | 1,000            | 0,000 | 0,000 |       |       |       |
|                                                                             | 3 high ((Fach)-Abitur)             | 100       | 0,000            | 1,000 | 0,000 |       |       |       |
|                                                                             | 8 other/still going to school      | 10        | 0,000            | 0,000 | 1,000 |       |       |       |
| var_3dicho assessment of genetic research (approve - disapprove - not sure) | 0 disapprove (somewhat/definitely) | 27        | 1,000            | 0,000 |       |       |       |       |
|                                                                             | 1 approve (somewhat/definitely)    | 111       | 0,000            | 1,000 |       |       |       |       |
|                                                                             | 3 not sure                         | 31        | 0,000            | 0,000 |       |       |       |       |
| health_job have you ever worked in the health care-                         | 0 no, never                        | 132       | 0,000            |       |       |       |       |       |
|                                                                             | 1 yes, currently/before            | 37        | 1,000            |       |       |       |       |       |
| nat_dicho nationality (binary coding)                                       | 1 only German                      | 157       | 0,000            |       |       |       |       |       |
|                                                                             | 2 German & other / only other      | 12        | 1,000            |       |       |       |       |       |
| Var_12 gender                                                               | 1 male                             | 73        | 0,000            |       |       |       |       |       |
|                                                                             | 2 female                           | 96        | 1,000            |       |       |       |       |       |
| research_exp have you ever participated in research?                        | 0 no                               | 142       | 0,000            |       |       |       |       |       |
|                                                                             | 1 yes                              | 27        | 1,000            |       |       |       |       |       |
| var_9adicho ever heard of biobanks before (0/1-coding)                      | 0 no                               | 115       | 0,000            |       |       |       |       |       |
|                                                                             | 1 yes                              | 54        | 1,000            |       |       |       |       |       |

## Block 0: Beginning Block

Classification Table<sup>a,b</sup>

| Observed           |                                                                                  | Predicted                                                                        |                            | Percentage Correct |       |
|--------------------|----------------------------------------------------------------------------------|----------------------------------------------------------------------------------|----------------------------|--------------------|-------|
|                    |                                                                                  | var_10dicho willingness to participate in biobank-research (yes - no - not sure) |                            |                    |       |
|                    |                                                                                  | 0 no (probably/certainly not)                                                    | 1 yes (probably/certainly) |                    |       |
| Step 0             | var_10dicho willingness to participate in biobank-research (yes - no - not sure) | 0 no (probably/certainly not)                                                    | 0                          | 34                 | 0,0   |
|                    |                                                                                  | 1 yes (probably/certainly)                                                       | 0                          | 135                | 100,0 |
| Overall Percentage |                                                                                  |                                                                                  |                            |                    | 79,9  |

a. Constant is included in the model.

b. The cut value is ,500

### Variables in the Equation

|        |          | B     | S.E.  | Wald   | df | Sig.  | Exp(B) |
|--------|----------|-------|-------|--------|----|-------|--------|
| Step 0 | Constant | 1,379 | 0,192 | 51,642 | 1  | 0,000 | 3,971  |

### Variables not in the Equation

|        |           |                                                                     | Score  | df | Sig.   |
|--------|-----------|---------------------------------------------------------------------|--------|----|--------|
| Step 0 | Variables | assessment of genetic research (approve - disapprove - not sure)    | 15,754 | 2  | 0,000  |
|        |           | assessment of genetic research (approve - disapprove - not sure)(1) | 15,710 | 1  | 0,000  |
|        |           | assessment of genetic research (approve - disapprove - not sure)(2) | 6,548  | 1  | 0,011  |
|        |           | age-groups (steps of 10 years)                                      | 11,520 | 6  | 0,074  |
|        |           | age-groups (steps of 10 years)(1)                                   | 1,016  | 1  | 0,314  |
|        |           | age-groups (steps of 10 years)(2)                                   | 0,310  | 1  | 0,578  |
|        |           | age-groups (steps of 10 years)(3)                                   | 1,013  | 1  | 0,314  |
|        |           | age-groups (steps of 10 years)(4)                                   | 5,580  | 1  | 0,018  |
|        |           | age-groups (steps of 10 years)(5)                                   | 2,081  | 1  | 0,149  |
|        |           | age-groups (steps of 10 years)(6)                                   | 2,614  | 1  | 0,106  |
|        |           | gender(1)                                                           | 3,296  | 1  | 0,069  |
|        |           | school education (low - middle - high)                              | 1,418  | 3  | 0,701  |
|        |           | school education (low - middle - high)(1)                           | 1,013  | 1  | 0,314  |
|        |           | school education (low - middle - high)(2)                           | 1,266  | 1  | 0,261  |
|        |           | school education (low - middle - high)(3)                           | 0,000  | 1  | 0,992  |
|        |           | have you ever worked in the health care-sector?(1)                  | 1,407  | 1  | 0,236  |
|        |           | have you ever participated in research?(1)                          | 0,051  | 1  | 0,821  |
|        |           | nationality (binary coding)(1)                                      | 1,404  | 1  | 0,236  |
|        |           | ever heard of biobanks before (0/1-coding)(1)                       | 0,003  | 1  | 0,955  |
|        |           | Overall Statistics                                                  |        |    | 31,071 |

### Block 1: Method = Forward Stepwise (Wald)

#### Omnibus Tests of Model Coefficients

|        |       | Chi-square | df | Sig.  |
|--------|-------|------------|----|-------|
| Step 1 | Step  | 13,348     | 2  | 0,001 |
|        | Block | 13,348     | 2  | 0,001 |
|        | Model | 13,348     | 2  | 0,001 |
| Step 2 | Step  | 5,874      | 1  | 0,015 |
|        | Block | 19,222     | 3  | 0,000 |
|        | Model | 19,222     | 3  | 0,000 |

### Model Summary

| Step | -2 Log likelihood    | Cox & Snell R Square | Nagelkerke R Square |
|------|----------------------|----------------------|---------------------|
| 1    | 156,341 <sup>a</sup> | 0,076                | 0,120               |
| 2    | 150,467 <sup>b</sup> | 0,108                | 0,170               |

a. Estimation terminated at iteration number 4 because parameter estimates changed by less

b. Estimation terminated at iteration number 5 because parameter estimates changed by less

### Hosmer and Lemeshow Test

| Step | Chi-square | df | Sig.  |
|------|------------|----|-------|
| 1    | 0,000      | 1  | 1,000 |
| 2    | 2,713      | 4  | 0,607 |

### Contingency Table for Hosmer and Lemeshow Test

|        |   | participate in biobank-research |          | participate in biobank-research (yes) |          | Total |
|--------|---|---------------------------------|----------|---------------------------------------|----------|-------|
|        |   | Observed                        | Expected | Observed                              | Expected |       |
| Step 1 | 1 | 13                              | 13,000   | 14                                    | 14,000   | 27    |
|        | 2 | 5                               | 5,000    | 26                                    | 26,000   | 31    |
|        | 3 | 16                              | 16,000   | 95                                    | 95,000   | 111   |
| Step 2 | 1 | 6                               | 7,507    | 6                                     | 4,493    | 12    |
|        | 2 | 7                               | 5,493    | 8                                     | 9,507    | 15    |
|        | 3 | 5                               | 4,204    | 16                                    | 16,796   | 21    |
|        | 4 | 13                              | 12,289   | 50                                    | 50,711   | 63    |
|        | 5 | 0                               | 0,796    | 10                                    | 9,204    | 10    |
|        | 6 | 3                               | 3,711    | 45                                    | 44,289   | 48    |

### Classification Table<sup>a</sup>

| Observed |                                                                                  |                               | Predicted                                                                        |                            | Percentage Correct |
|----------|----------------------------------------------------------------------------------|-------------------------------|----------------------------------------------------------------------------------|----------------------------|--------------------|
|          |                                                                                  |                               | var_10dicho willingness to participate in biobank-research (yes - no - not sure) |                            |                    |
|          |                                                                                  |                               | 0 no (probably/certainly not)                                                    | 1 yes (probably/certainly) |                    |
| Step 1   | var_10dicho willingness to participate in biobank-research (yes - no - not sure) | 0 no (probably/certainly not) | 0                                                                                | 34                         | 0,0                |
|          |                                                                                  | 1 yes (probably/certainly)    | 0                                                                                | 135                        | 100,0              |
|          | Overall Percentage                                                               |                               |                                                                                  |                            | 79,9               |
| Step 2   | var_10dicho willingness to participate in biobank-research (yes - no - not sure) | 0 no (probably/certainly not) | 6                                                                                | 28                         | 17,6               |
|          |                                                                                  | 1 yes (probably/certainly)    | 6                                                                                | 129                        | 95,6               |
|          | Overall Percentage                                                               |                               |                                                                                  |                            | 79,9               |

a. The cut value is ,500

### Variables in the Equation

|                     |                                                                  | B      | S.E.  | Wald   | df | Sig.  | Exp(B) |
|---------------------|------------------------------------------------------------------|--------|-------|--------|----|-------|--------|
| Step 1 <sup>a</sup> | assessment of genetic research (approve - disapprove - not sure) |        |       | 13,810 | 2  | 0,001 |        |
|                     | assessment of genetic research (approve - disapprove - not       | -1,575 | 0,622 | 6,409  | 1  | 0,011 | 0,207  |
|                     | assessment of genetic research (approve - disapprove - not       | 0,133  | 0,558 | 0,056  | 1  | 0,812 | 1,142  |
|                     | Constant                                                         | 1,649  | 0,488 | 11,398 | 1  | 0,001 | 5,200  |
| Step 2 <sup>b</sup> | assessment of genetic research (approve - disapprove - not sure) |        |       | 15,598 | 2  | 0,000 |        |
|                     | assessment of genetic research (approve - disapprove - not       | -1,899 | 0,658 | 8,327  | 1  | 0,004 | 0,150  |
|                     | assessment of genetic research (approve - disapprove - not       | 0,032  | 0,566 | 0,003  | 1  | 0,955 | 1,033  |
|                     | gender(1)                                                        | -1,062 | 0,461 | 5,302  | 1  | 0,021 | 0,346  |
|                     | Constant                                                         | 2,447  | 0,623 | 15,452 | 1  | 0,000 | 11,557 |

a. Variable(s) entered on step 1: assessment of genetic research (approve - disapprove - not sure).

b. Variable(s) entered on step 2: gender.

### Variables not in the Equation

|        |           |                                                    | Score              | df | Sig.   |
|--------|-----------|----------------------------------------------------|--------------------|----|--------|
| Step 1 | Variables | age-groups (steps of 10 years)                     | 10,144             | 6  | 0,119  |
|        |           | age-groups (steps of 10 years)(1)                  | 2,308              | 1  | 0,129  |
|        |           | age-groups (steps of 10 years)(2)                  | 1,338              | 1  | 0,247  |
|        |           | age-groups (steps of 10 years)(3)                  | 1,233              | 1  | 0,267  |
|        |           | age-groups (steps of 10 years)(4)                  | 3,359              | 1  | 0,067  |
|        |           | age-groups (steps of 10 years)(5)                  | 0,830              | 1  | 0,362  |
|        |           | age-groups (steps of 10 years)(6)                  | 2,417              | 1  | 0,120  |
|        |           | gender(1)                                          | 5,572              | 1  | 0,018  |
|        |           | school education (low - middle - high)             | 1,287              | 3  | 0,732  |
|        |           | school education (low - middle - high)(1)          | 0,491              | 1  | 0,483  |
|        |           | school education (low - middle - high)(2)          | 1,194              | 1  | 0,274  |
|        |           | school education (low - middle - high)(3)          | 0,416              | 1  | 0,519  |
|        |           | have you ever worked in the health care-sector?(1) | 2,530              | 1  | 0,112  |
|        |           | have you ever participated in research?(1)         | 0,000              | 1  | 0,995  |
|        |           | nationality (binary coding)(1)                     | 0,480              | 1  | 0,488  |
|        |           | ever heard of biobanks before (0/1-coding)(1)      | 0,027              | 1  | 0,869  |
|        |           |                                                    | Overall Statistics |    | 16,307 |
| Step 2 | Variables | age-groups (steps of 10 years)                     | 8,571              | 6  | 0,199  |
|        |           | age-groups (steps of 10 years)(1)                  | 2,222              | 1  | 0,136  |

|                                                    |        |    |       |
|----------------------------------------------------|--------|----|-------|
| age-groups (steps of 10 years)(2)                  | 1,149  | 1  | 0,284 |
| age-groups (steps of 10 years)(3)                  | 1,050  | 1  | 0,306 |
| age-groups (steps of 10 years)(4)                  | 2,476  | 1  | 0,116 |
| age-groups (steps of 10 years)(5)                  | 0,860  | 1  | 0,354 |
| age-groups (steps of 10 years)(6)                  | 1,938  | 1  | 0,164 |
| school education (low - middle - high)             | 1,306  | 3  | 0,728 |
| school education (low - middle - high)(1)          | 0,339  | 1  | 0,561 |
| school education (low - middle - high)(2)          | 1,050  | 1  | 0,306 |
| school education (low - middle - high)(3)          | 0,676  | 1  | 0,411 |
| have you ever worked in the health care-sector?(1) | 1,245  | 1  | 0,265 |
| have you ever participated in research?(1)         | 0,083  | 1  | 0,773 |
| nationality (binary coding)(1)                     | 0,667  | 1  | 0,414 |
| ever heard of biobanks before (0/1-coding)(1)      | 0,032  | 1  | 0,857 |
| Overall Statistics                                 | 10,945 | 13 | 0,615 |
